# Supplementary material for: Fine-scale vertical structure of sound-scattering layers over an east border upwelling system and its relationship to pelagic habitat characteristics
Source: Copernicus journal article supplement (doi:10.5194/os-16-65-2020), 2020-01-13
Supplement: Supplementary file [file os-16-65-2020-supplement-title-page.pdf › os-16-65-2020-supplement-title-page.pdf]

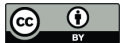

## *Supplement of*

# **Fine-scale vertical structure of sound-scattering layers over an east border upwelling system and its relationship to pelagic habitat characteristics**

**Ndagoue Diogoul et al.**

*Correspondence to:* Ndagoue Diogoul ([diogoulndague@yahoo.fr](mailto:diogoulndague@yahoo.fr))

- [os-16-65-2020-supplement-title-page.pdf](#)
- [supplement](#)
  - [Fig S1.png](#)
  - [Fig S2.png](#)
  - [Fig S3a.png](#)
  - [Fig S3b.png](#)
  - [Fig S4a.png](#)
  - [Fig S4b.png](#)
  - [Fig S5a.png](#)
  - [Fig S5b.png](#)
  - [Fig S6.png](#)
  - [Fig S7.png](#)
  - [Fig S8 a.png](#)
  - [Fig S8 b.png](#)
  - [Fig S8 c.png](#)
  - [Fig S8 d.png](#)
  - [Supplementary materials.docx](#)

The copyright of individual parts of the supplement might differ from the CC BY 4.0 License.
